# Supplementary material for: Galactose-functionalised PCL nanofibre scaffolds to attenuate inflammatory action of astrocytes in vitro and in vivo
Source: Royal Society of Chemistry journal article supplement (doi:10.1039/c7tb00651a), 2017-01-01
Supplement: c7tb00651a1.pdf [file c7tb00651a1.pdf]

## Supplementary Information

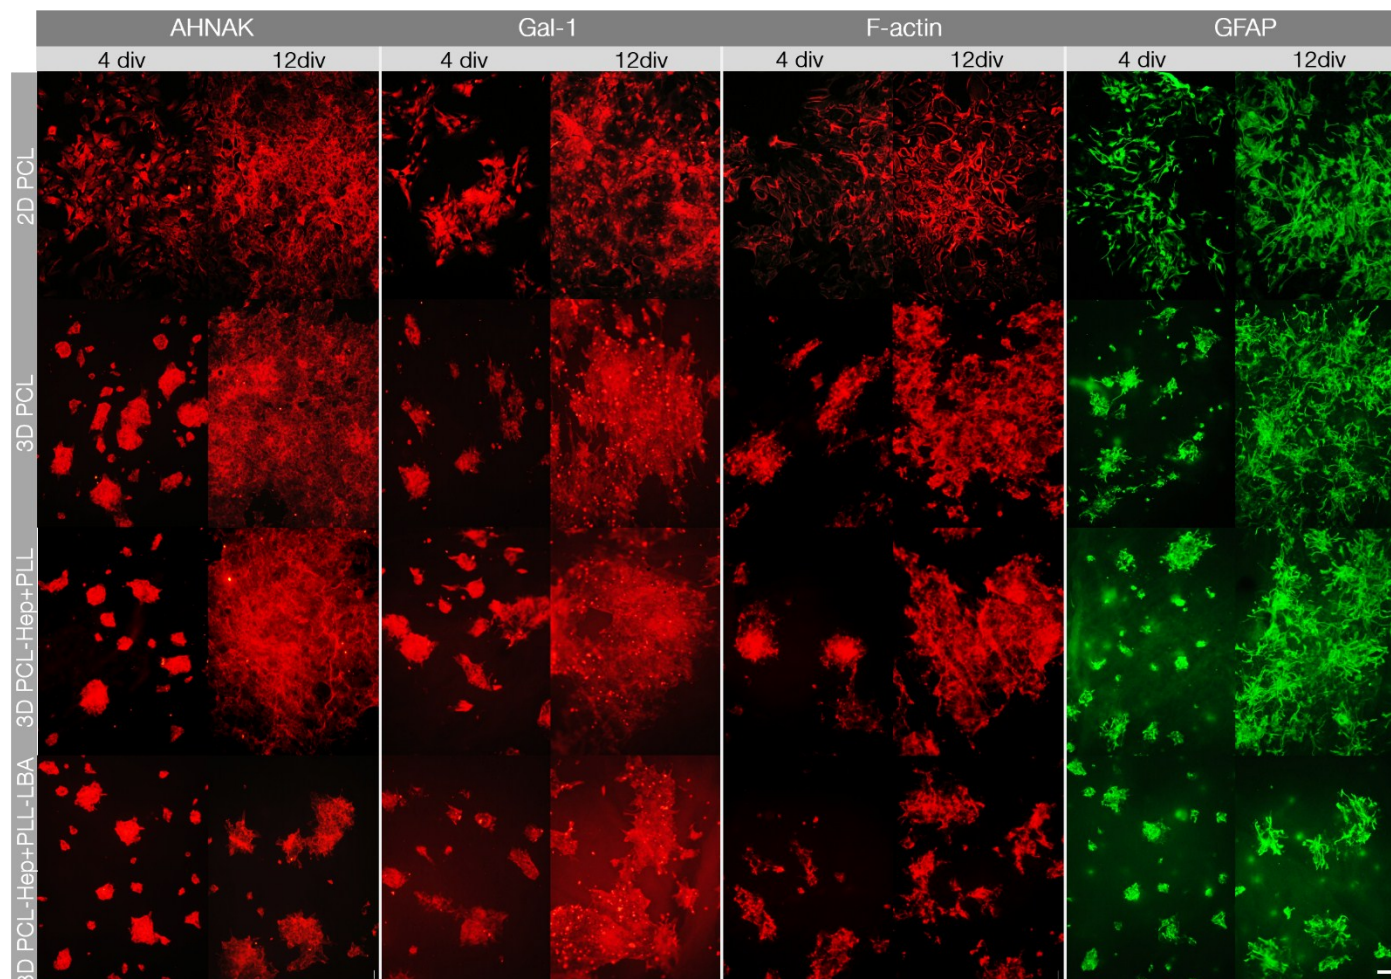

**Figure S 1: AHNAK, Gal-1, and F-actin (red) and GFAP (green) staining of astrocytes grown on 2D PCL, 3D PCL, PCL-Hep+PLL and PCL-Hep+PLL-LA at 4 and 12 *div*. Scale bar = 100  $\mu\text{m}$**
